# Supplementary material for: Preparation and characterization of HfOC/SiOC composite powders and fibermats via the polymer pyrolysis route
Source: Royal Society of Chemistry journal article supplement (doi:10.1039/d5ra02006a), 2025-01-01
Supplement: d5ra02006a1.pdf [file d5ra02006a1.pdf]

## Supporting information

### Preparation and characterization of HfOC/SiOC Composite Powders and Fibermats via the Polymer Pyrolysis Route

Arijit Roy<sup>1†</sup>, Paul Owiredun<sup>1†</sup>, Gurpreet Singh<sup>1\*</sup>

<sup>1</sup>Mechanical and Nuclear Engineering Department, Kansas State University, Manhattan, KS 66506, USA

<sup>†</sup>Equal contribution

Email: [arijit@ksu.edu](mailto:arijit@ksu.edu) (A Roy), [gurpreet@ksu.edu](mailto:gurpreet@ksu.edu) (G Singh)

Table S1: Crosslink to pyrolysis yield of HfOC/SiOC particles and fibermats pyrolyzed at different temperatures.

| Samples                     | Yield at 800 °C | Yield at 1000 °C | Yield at 1200 °C |
|-----------------------------|-----------------|------------------|------------------|
| HfOC/SiOC particles (wt. %) | 77.6            | 77.6             | 74.2             |
| HfOC/SiOC fibermat (wt. %)  | 22.7            | 20.3             | 18.5             |
| HfOC/SiOC fibermat (area %) | 29.2            | 29.3             | 26.5             |

Table S2: Oxidation mass loss of ceramic fibermat samples.

| Sample Name | Mass loss for py at 800 °C (wt.%) | Mass loss for py at 1000 °C (wt.%) | Mass loss for py at 1200 °C (wt.%) |
|-------------|-----------------------------------|------------------------------------|------------------------------------|
| SiOC        | 41                                | 70.6                               | 67.5                               |
| HfOC/SiOC   | 53.5                              | 58.3                               | 55.3                               |

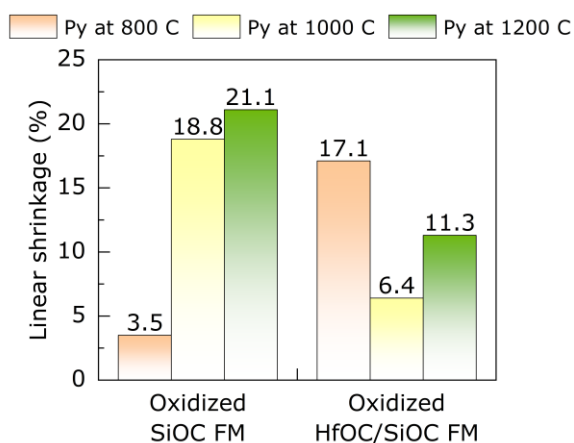

Figure S1: Linear shrinkage (in diameter) analysis for 800 °C oxidization of PVP, SiOC, and HfOC/SiOC fibermats.

Table S3: Thickness of the pre- and post-oxidized HfOC/SiOC fibermats.

| HfOC/SiOC sample<br>pyrolyzed at | Pre-oxidization test<br>thickness ( $\mu\text{m}$ ) | Post-oxidization test<br>thickness ( $\mu\text{m}$ ) | Reduction in<br>thickness (%) |
|----------------------------------|-----------------------------------------------------|------------------------------------------------------|-------------------------------|
| 800 °C                           | 220                                                 | 70                                                   | 68                            |
| 1000 °C                          | 140                                                 | 70                                                   | 50                            |
| 1200 °C                          | 100                                                 | 80                                                   | 20                            |
